# Supplementary material for: IL-15 Harnesses Pro-inflammatory Function of TEMRA CD8 in Kidney-Transplant Recipients
Source: PubMed Central journal article supplement (PMC5492498; doi:10.3389/fimmu.2017.00778), 2017-06-30

Supplementary Figure 1

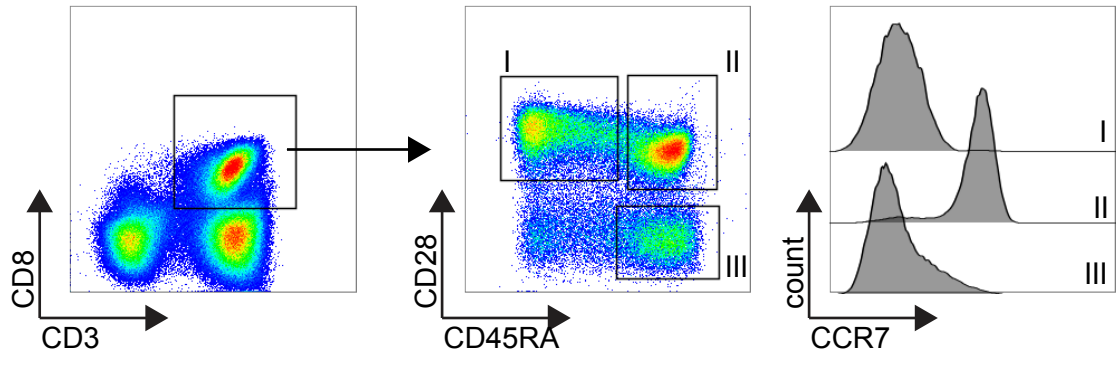

Supplement: image_1.pdf [file image_1.pdf]
